# Supplementary material for: Proton-pump Inhibitor Use and Fracture Risk: An Updated Systematic Review and Meta-analysis
Source: PubMed Central journal article supplement — J Bone Metab. 2018 Aug 31;25(3):141–51. doi: 10.11005/jbm.2018.25.3.141 (PMC6135649; doi:10.11005/jbm.2018.25.3.141), 2018-08-31
Supplement: jbm-25-141-s001.pdf [file jbm-25-141-s001.pdf]

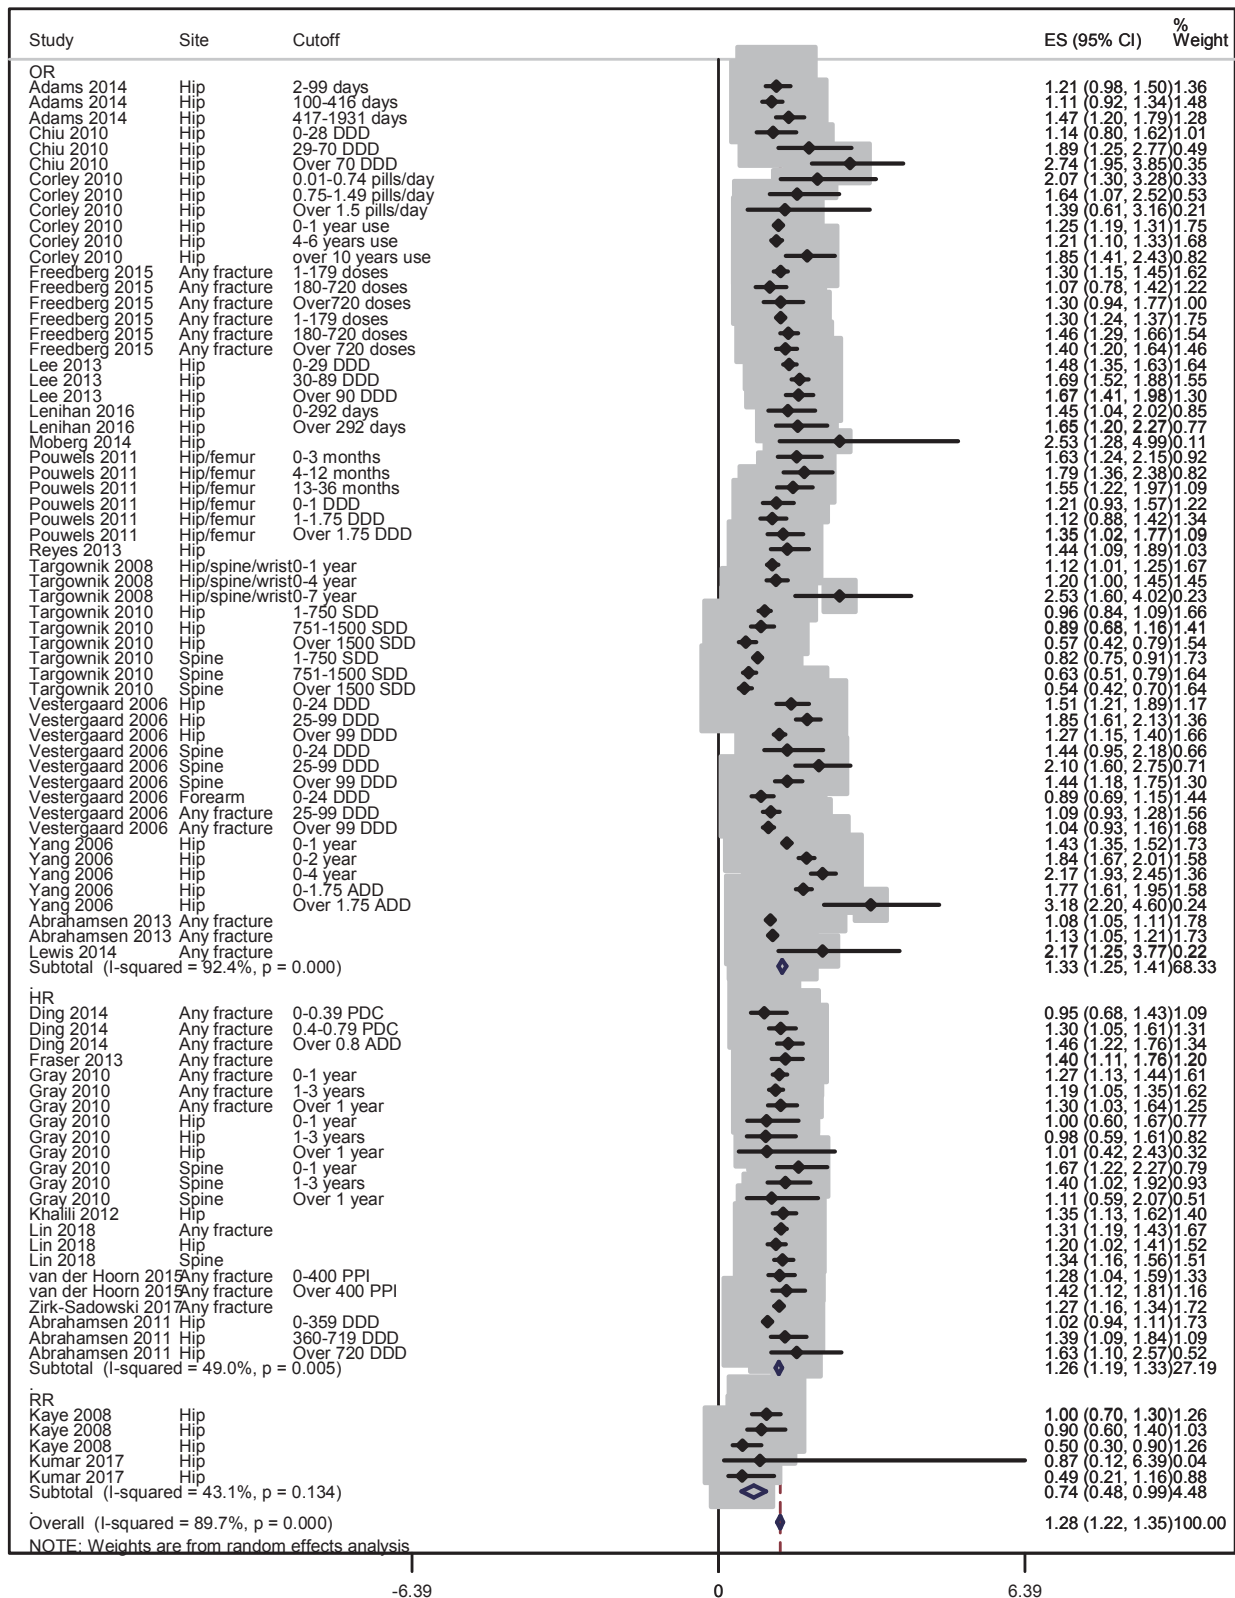

**Supplementary Fig. 1.** Forest graph showing the outcomes of an overall pooling of all odds ratios, hazard ratios, and relative risks for point estimation depicting relationship between the proton-pump inhibitor (PPI) use and the incidence of fracture. DDD, defined daily dose; SDD, standard daily dose; PDC, proportion of days covered; ES, effect sizes; CI, confidence interval.
