# Supplementary material for: Proton-pump Inhibitor Use and Fracture Risk: An Updated Systematic Review and Meta-analysis
Source: PubMed Central journal article supplement — J Bone Metab. 2018 Aug 31;25(3):141–51. doi: 10.11005/jbm.2018.25.3.141 (PMC6135649; doi:10.11005/jbm.2018.25.3.141), 2018-08-31
Supplement: jbm-25-141-s002.pdf [file jbm-25-141-s002.pdf]

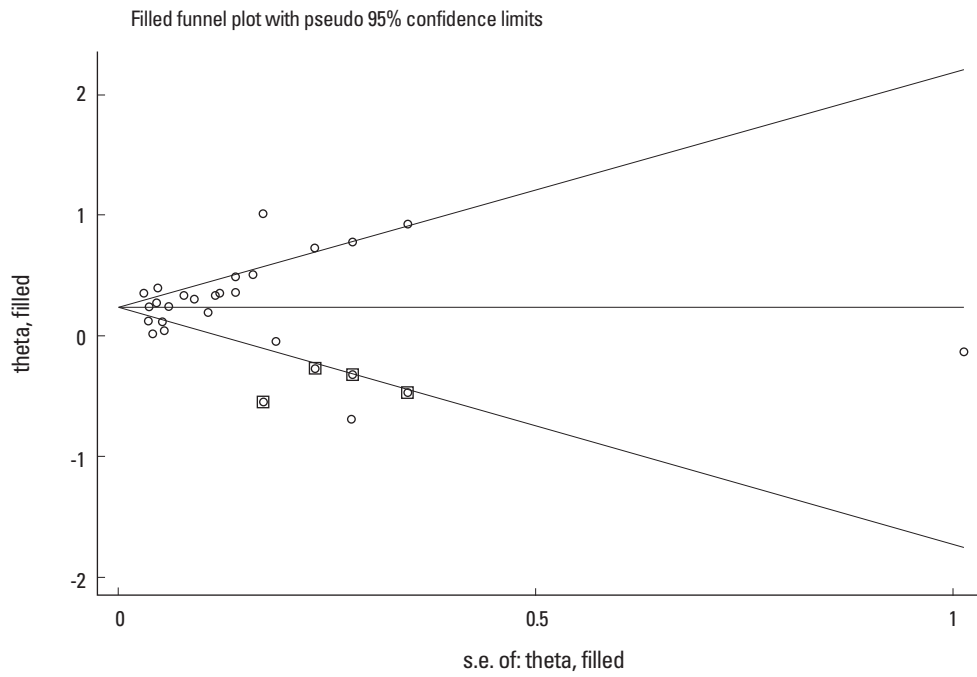

**Supplementary Fig. 2.** A funnel plot showing the outcomes of trim and fill method of publication bias assessment. Theta represents the effect sizes of point estimate ratios.
